# Supplementary material for: Pharmacokinetic Modeling of Ceftiofur Sodium Using Nonlinear Mixed-Effects in Healthy Beagle Dogs
Source: Preprints.org preprint supplement (doi:10.20944/preprints201907.0322.v1), 2019-07-28
Supplement: Supplementary file 1 [file supplementary]

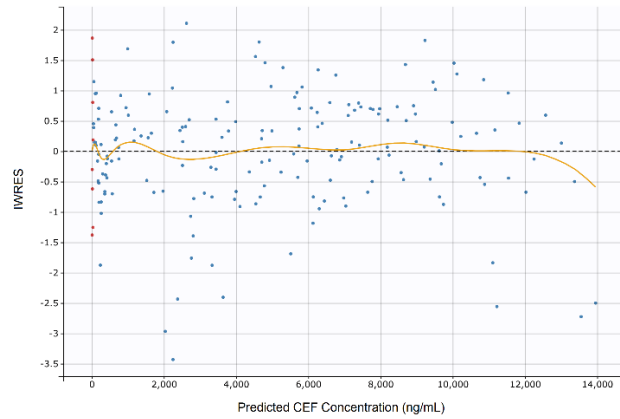

Figure A

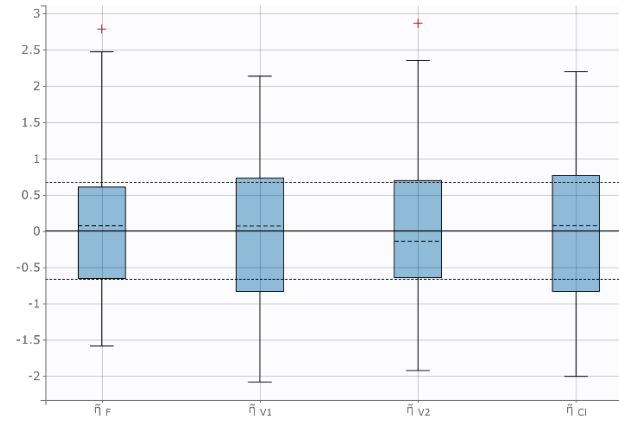

Figure B

Supplemental Figure. (A): Scatter plots of model residuals (Individual Weighted Residual, IWRES) vs. predicted CEF concentrations. Brown line: regression curve; red dots: censored (i.e. below the quantification limit) data. A suitable model should have the following features: (i) residuals (IWRES) should be centered around a mean value of 0 (i.e. the regression curve should mirror a horizontal line of  $y=0$ ), (ii) a homogeneous distribution about the mean. (B) Boxplot of the distribution of the random effects ( $\eta_i$ ). Box: 1st quartile, median and 3rd quartile; Whiskers:  $\pm 1.5$  interquartile range; Red crosses: statistical outliers. The normality of the random effects was further confirmed by the homogeneous distribution of the random effects ( $\eta_i$ ) around a mean value of 0.
